# Supplementary material for: Ultrahigh electron-deficient pyrrolo-acenaphtho-pyridazine-dione based donor–acceptor conjugated polymers for electrochromic applications
Source: Royal Society of Chemistry journal article supplement (doi:10.1039/c5py01129a), 2015-01-01
Supplement: c5py01129a1.pdf [file c5py01129a1.pdf]

# Ultrahighly Electron-Deficient Pyrrolo-acenaphtho-pyridazine-dione Based Donor-Acceptor Conjugated Polymers for Electrochromic Applications

Ching Mui Cho,<sup>a,b,‡</sup> Qun Ye,<sup>a,‡</sup> Wei Teng Neo,<sup>a,c</sup> Tingting Lin,<sup>a</sup> Xuehong Lu,<sup>b,\*</sup>  
Jianwei Xu<sup>a,d,\*</sup>

<sup>a</sup> Institute of Materials Research and Engineering, A\*STAR, 3 Research Link, Singapore,  
117602

<sup>b</sup> School of Materials Science and Engineering, Nanyang Technological University, 50 Nanyang  
Avenue, Singapore 639798

<sup>c</sup> NUS Graduate School for Integrative Sciences and Engineering, National University of  
Singapore, 28 Medical Drive, Singapore 117456

<sup>d</sup> Department of Chemistry, National University of Singapore, 3 Science Drive 3, Singapore  
117543

Email: [jw-xu@imre.a-star.edu.sg](mailto:jw-xu@imre.a-star.edu.sg); [ASXHLu@ntu.edu.sg](mailto:ASXHLu@ntu.edu.sg)

<sup>‡</sup> These authors contribute equally to this work.

## Contents

1. NMR Spectra of all new compounds
2. High resolution MS data of all new compounds
3. TD-DFT Calculation Details
4. Cyclic voltammetry of Compound 10
5. Switching behavior of devices
6. Stability studies
7. X-ray crystallographic data
8. TGA thermograms
9. DSC thermograms
10. XRD diffractograms
11. GPC chromatograms

## 1. NMR Spectra of all new compounds

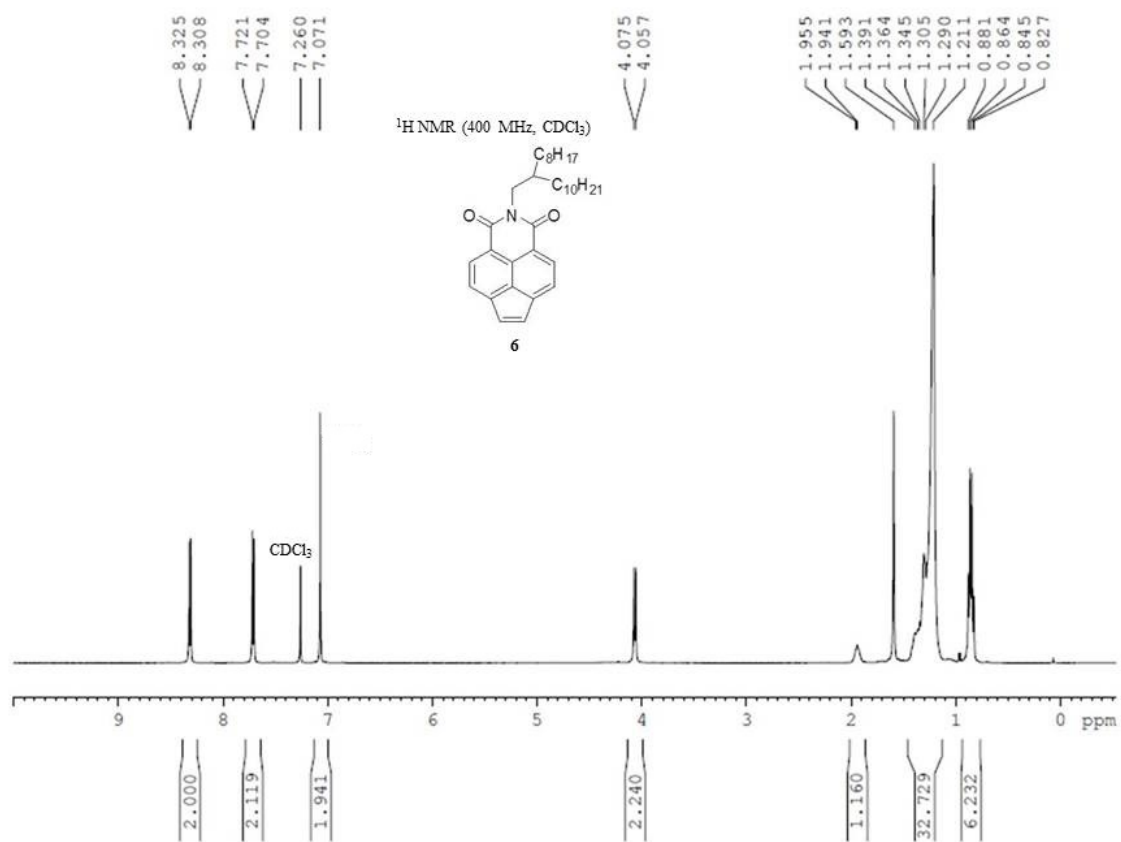

**Figure S1.** <sup>1</sup>H NMR spectrum of compound **6** (CDCl<sub>3</sub>, room temperature).

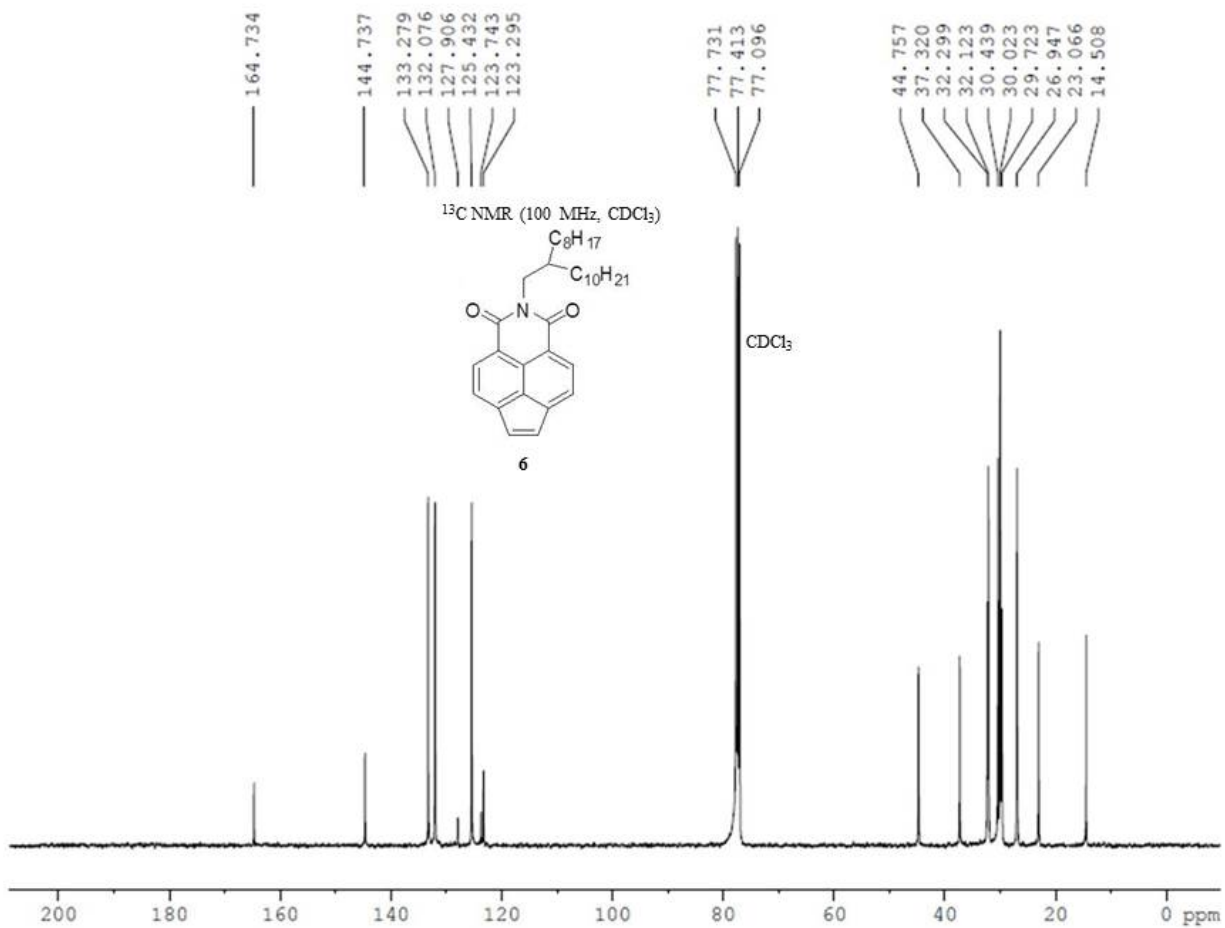

**Figure S2.** <sup>13</sup>C NMR spectrum of compound **6** (CDCl<sub>3</sub>, room temperature).

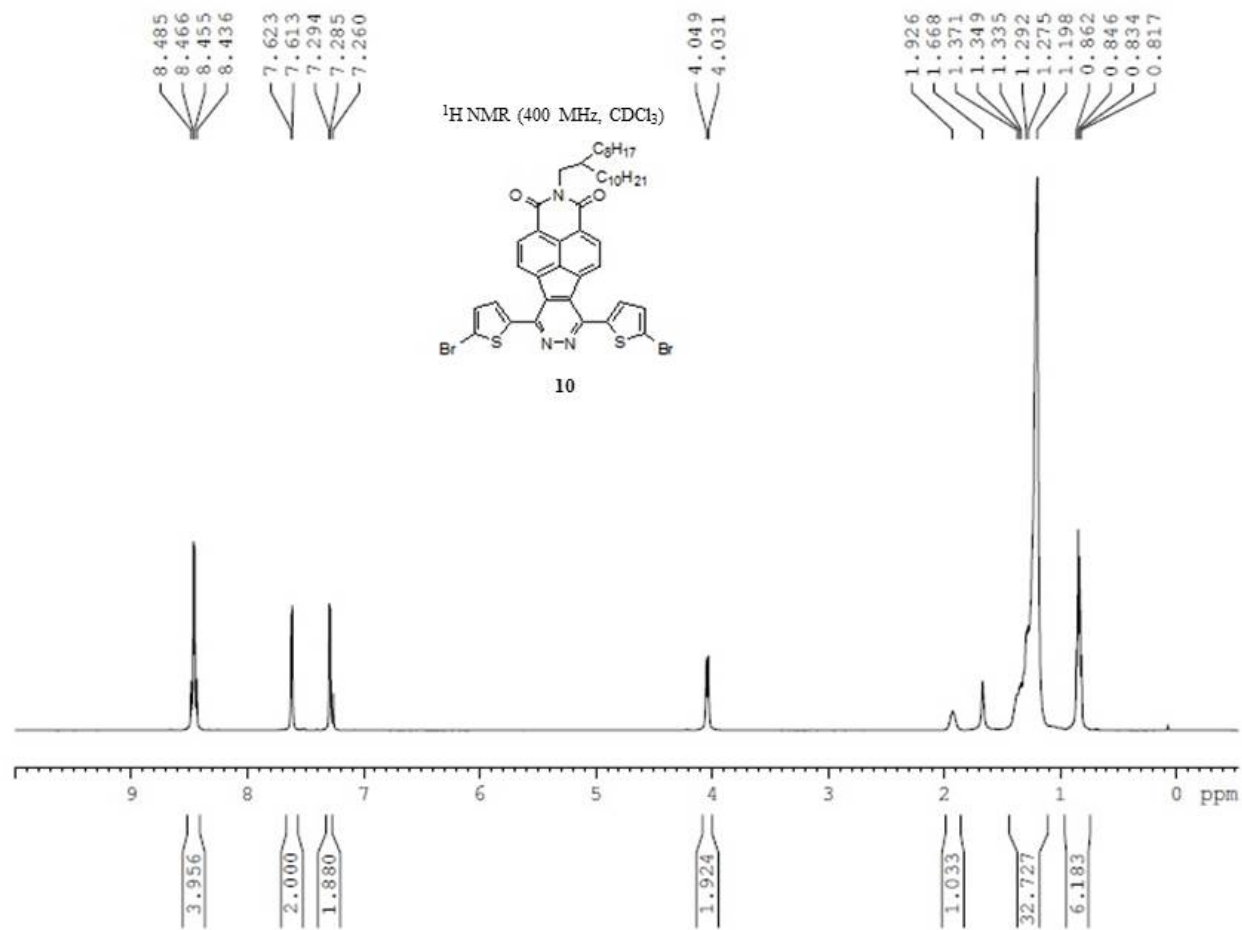

**Figure S3.** <sup>1</sup>H NMR spectrum of compound **10** (CDCl<sub>3</sub>, room temperature).

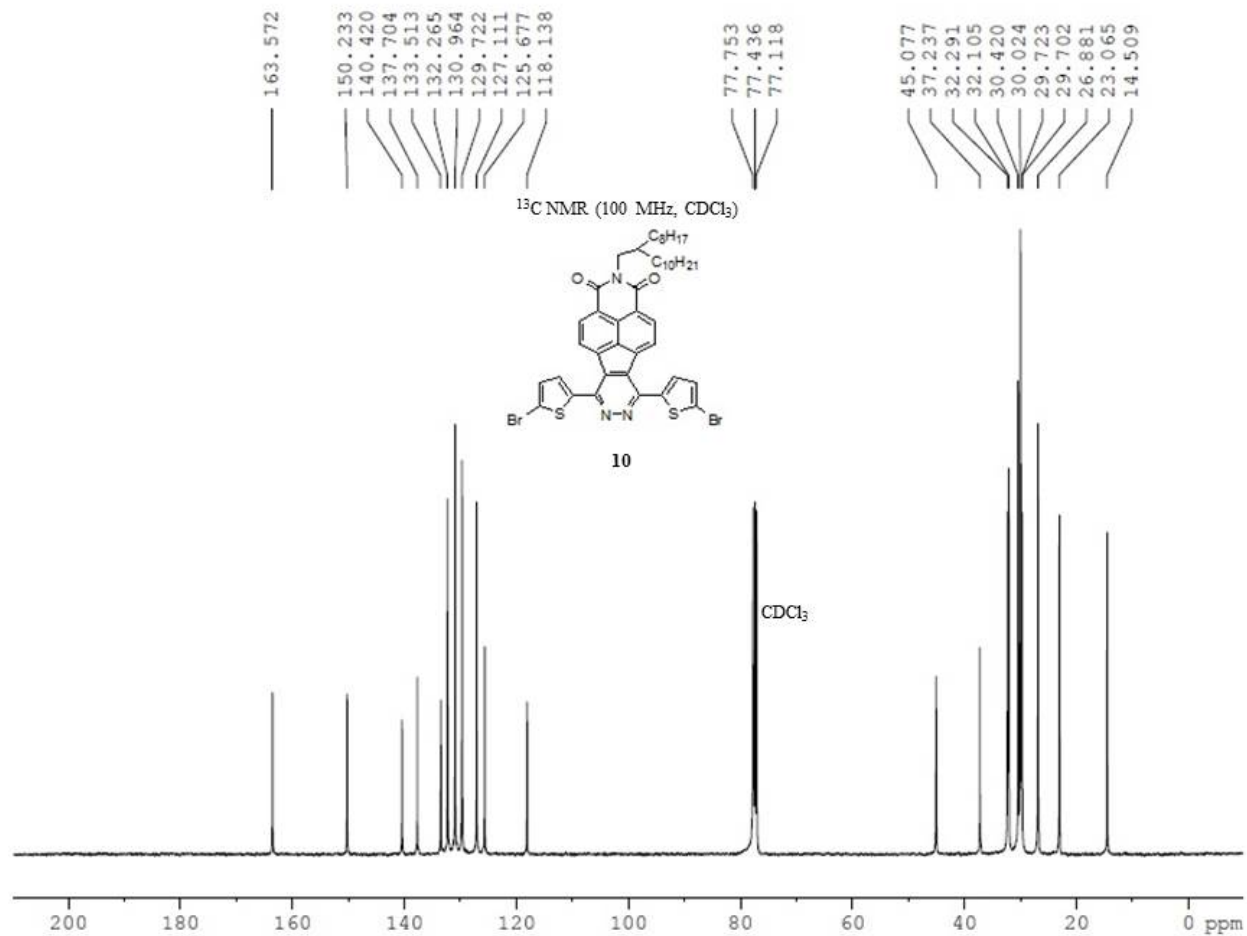

**Figure S4.** <sup>13</sup>C NMR spectrum of compound **10** (CDCl<sub>3</sub>, room temperature).

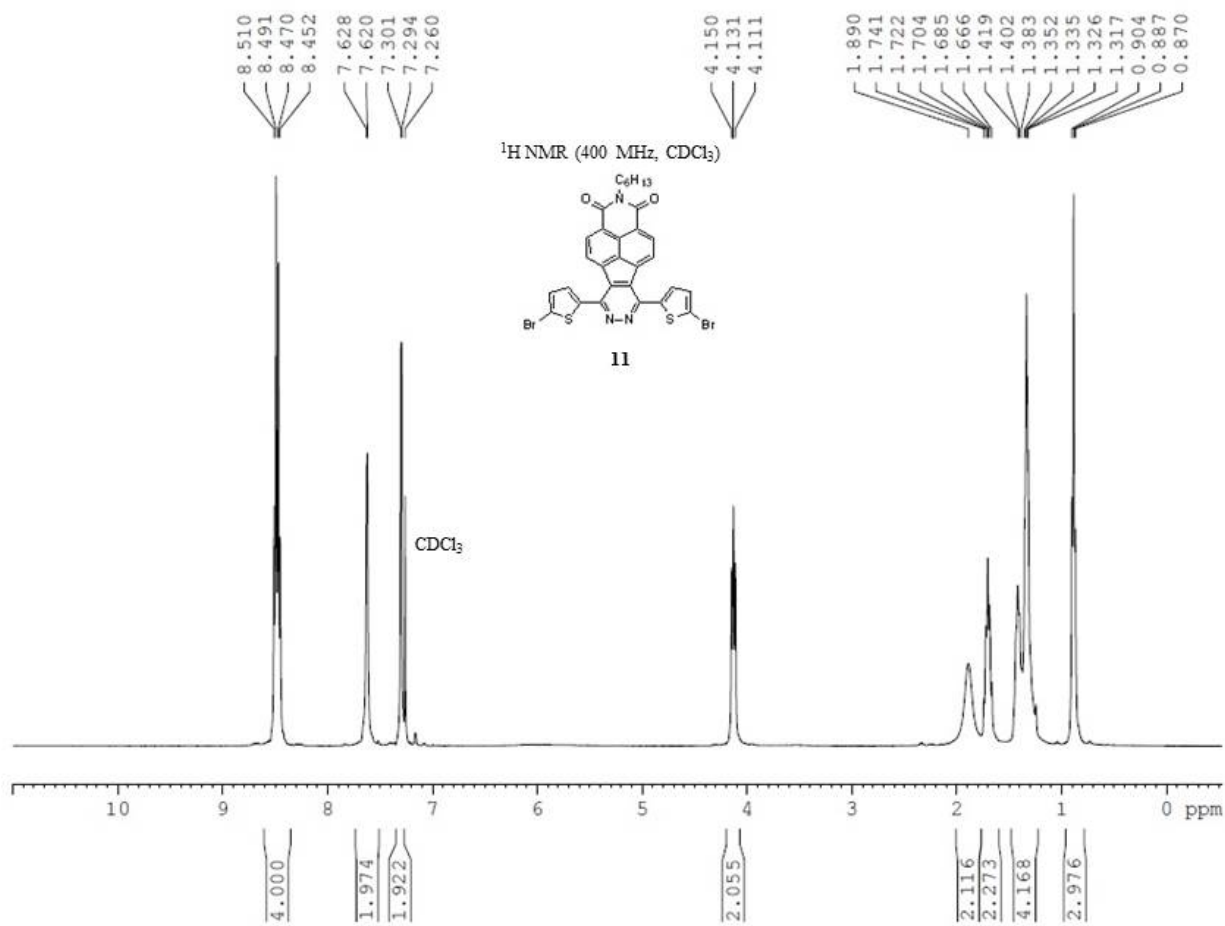

**Figure S5.** <sup>1</sup>H NMR spectrum of compound **11** (CDCl<sub>3</sub>, room temperature).

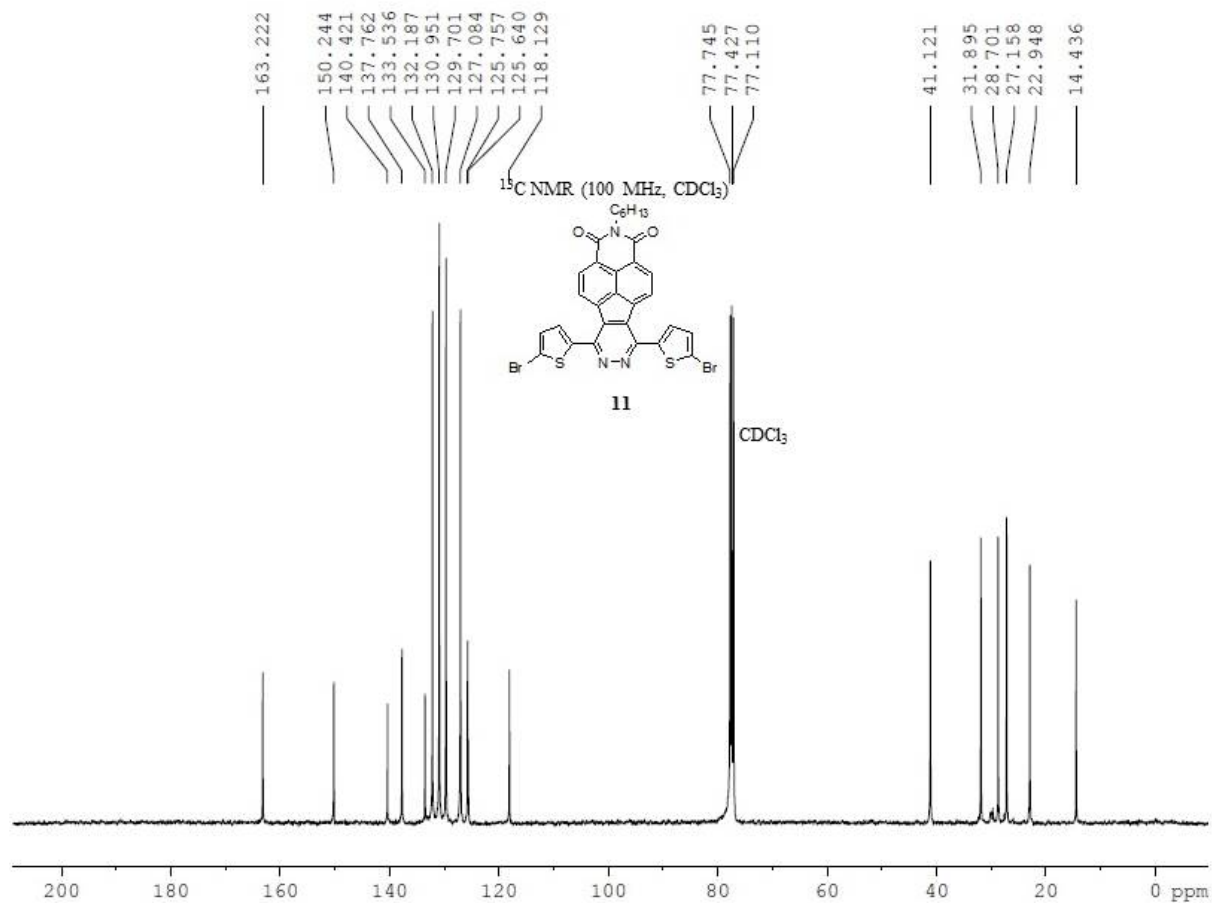

**Figure S6.** <sup>13</sup>C NMR spectrum of compound **11** (CDCl<sub>3</sub>, room temperature).

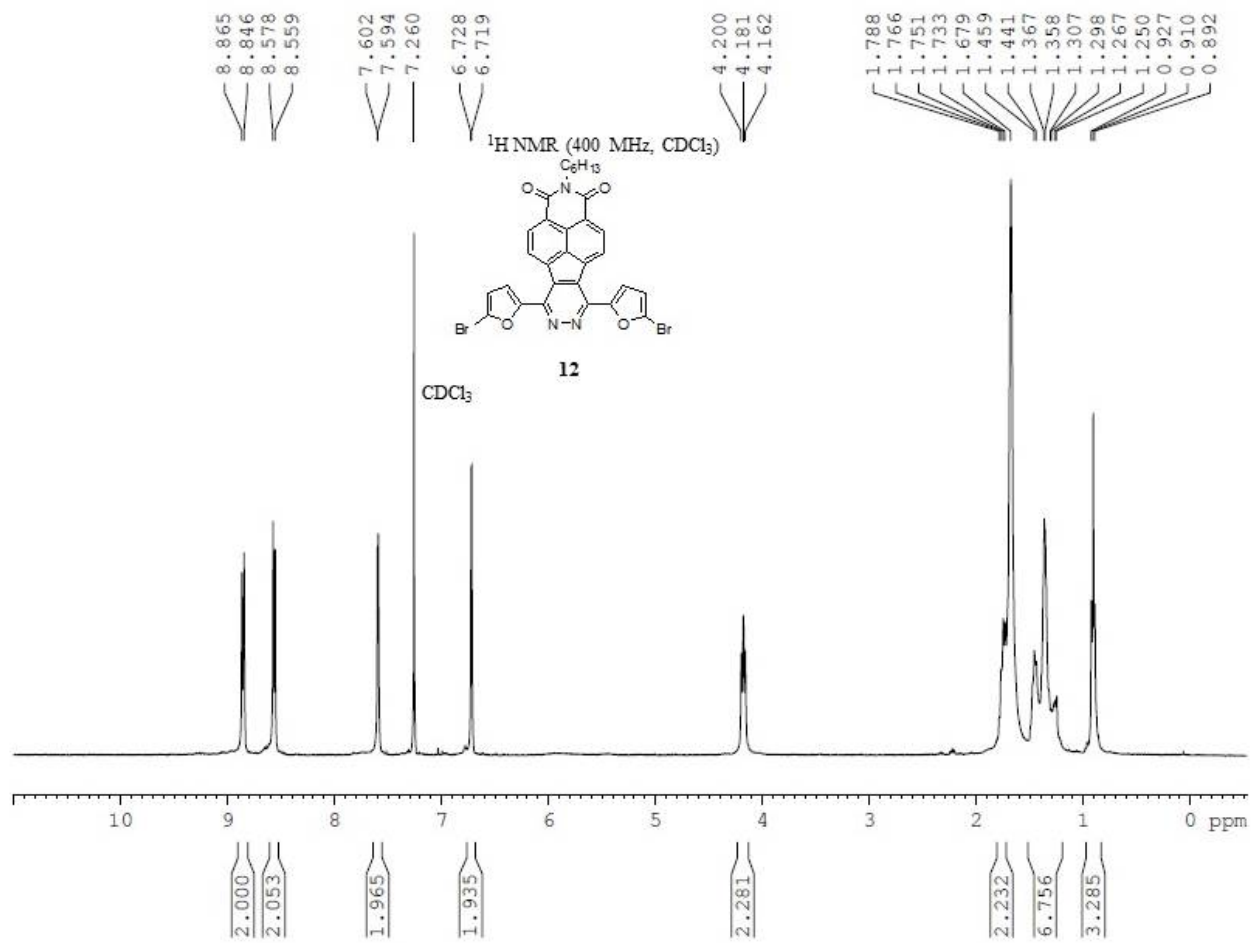

**Figure S7.** <sup>1</sup>H NMR spectrum of compound **12** (CDCl<sub>3</sub>, room temperature).



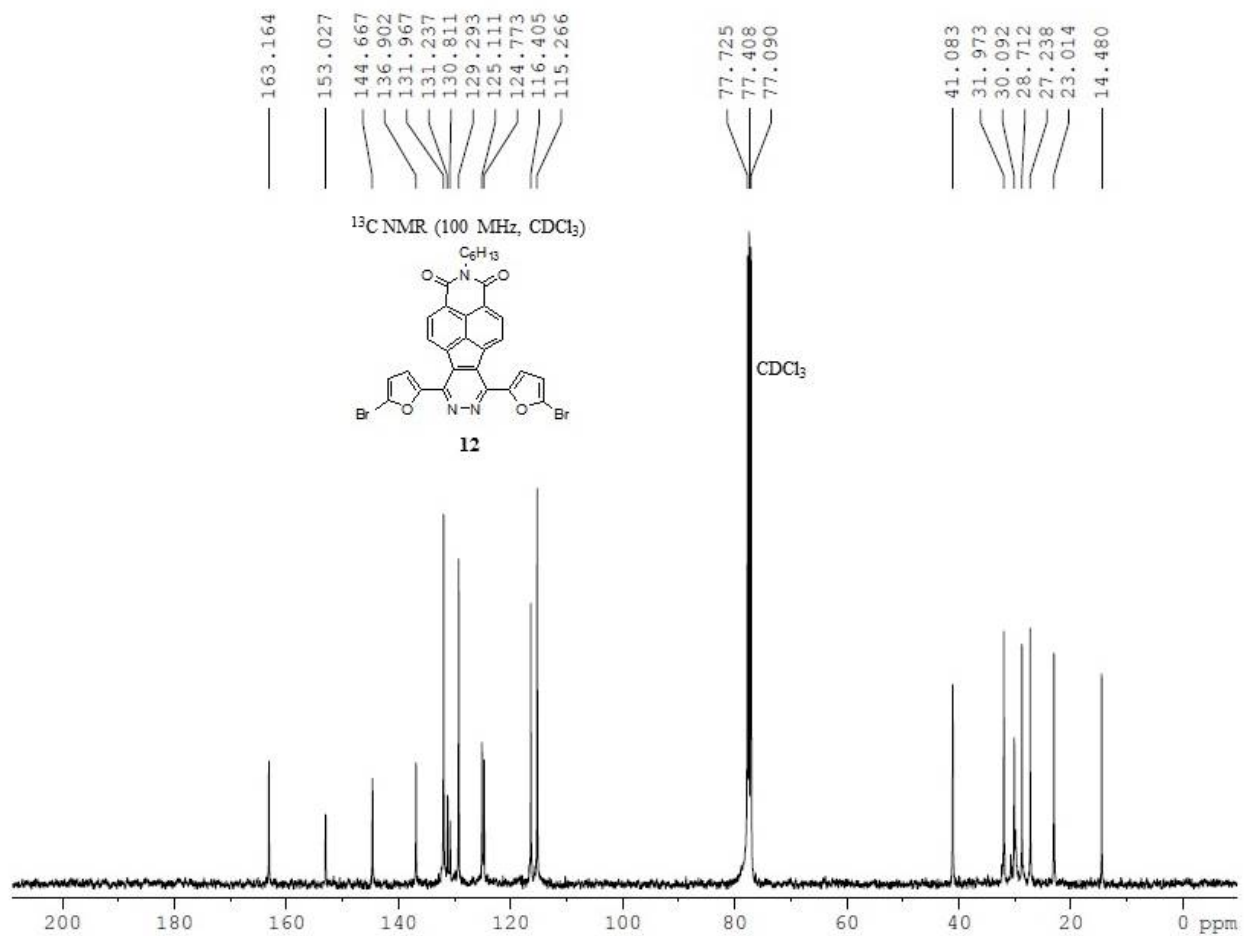

**Figure S8.**  $^{13}\text{C}$  NMR spectrum of compound **12** ( $\text{CDCl}_3$ , room temperature).

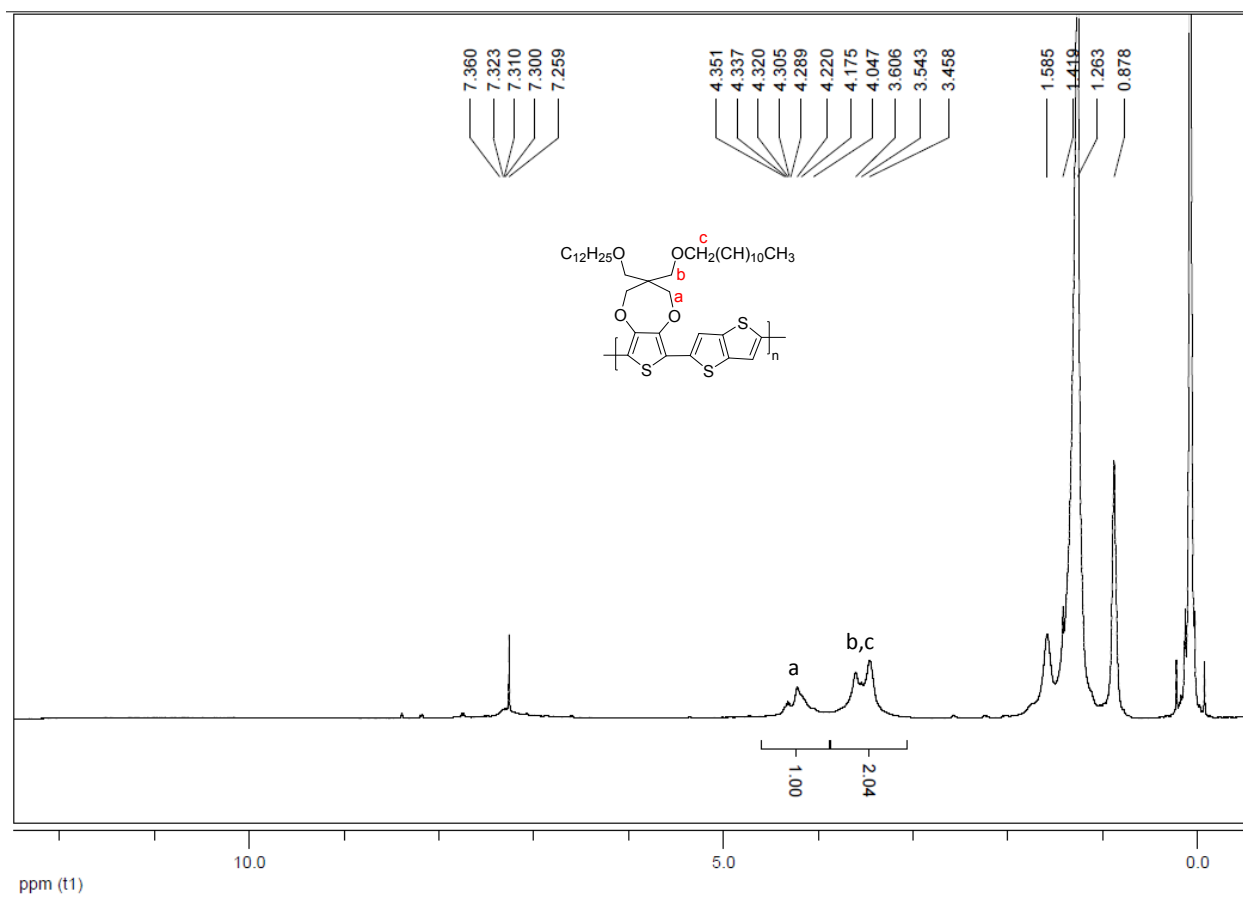

**Figure S9.** <sup>1</sup>H NMR spectrum of Polymer **P1** (CDCl<sub>3</sub>, room temperature).

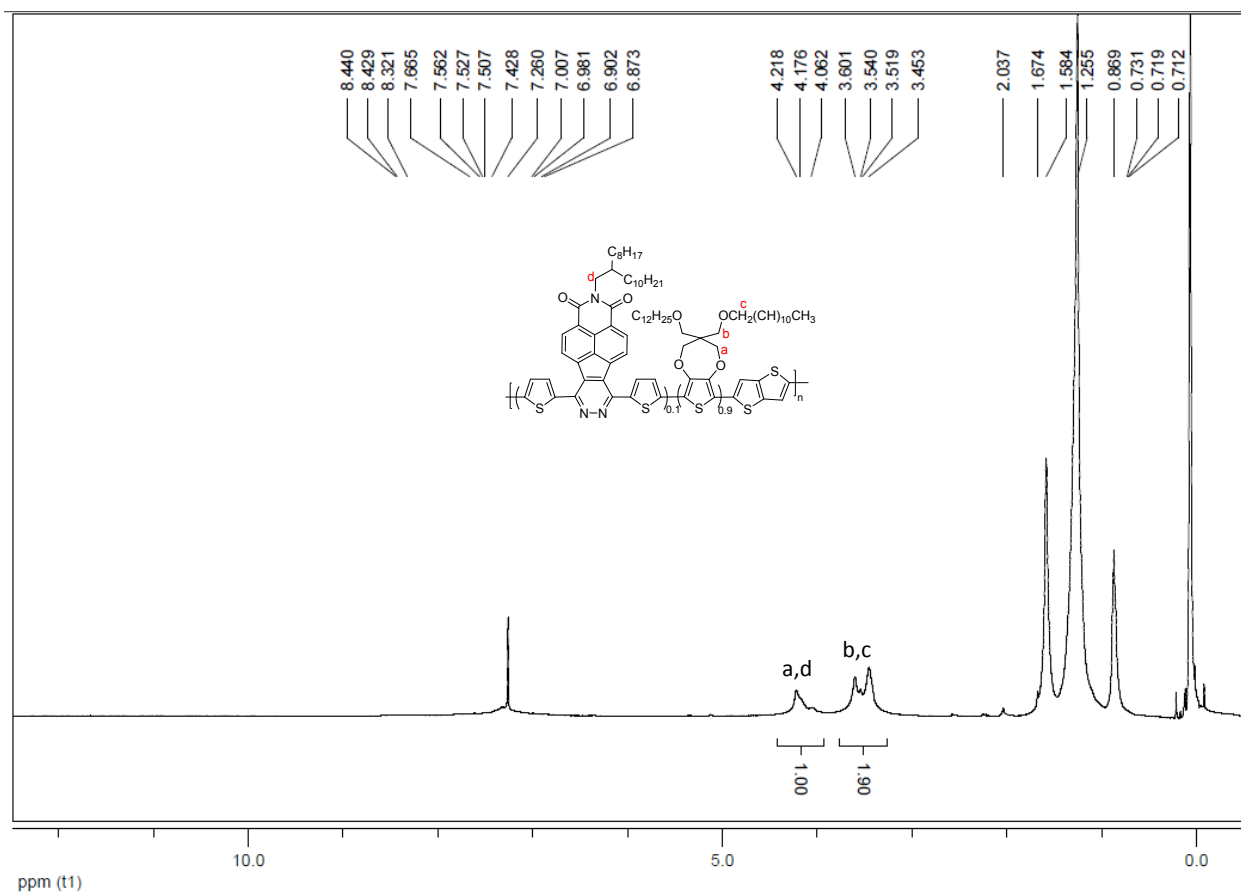

**Figure S10.**  $^1\text{H}$  NMR spectrum of Polymer P2 ( $\text{CDCl}_3$ , room temperature).

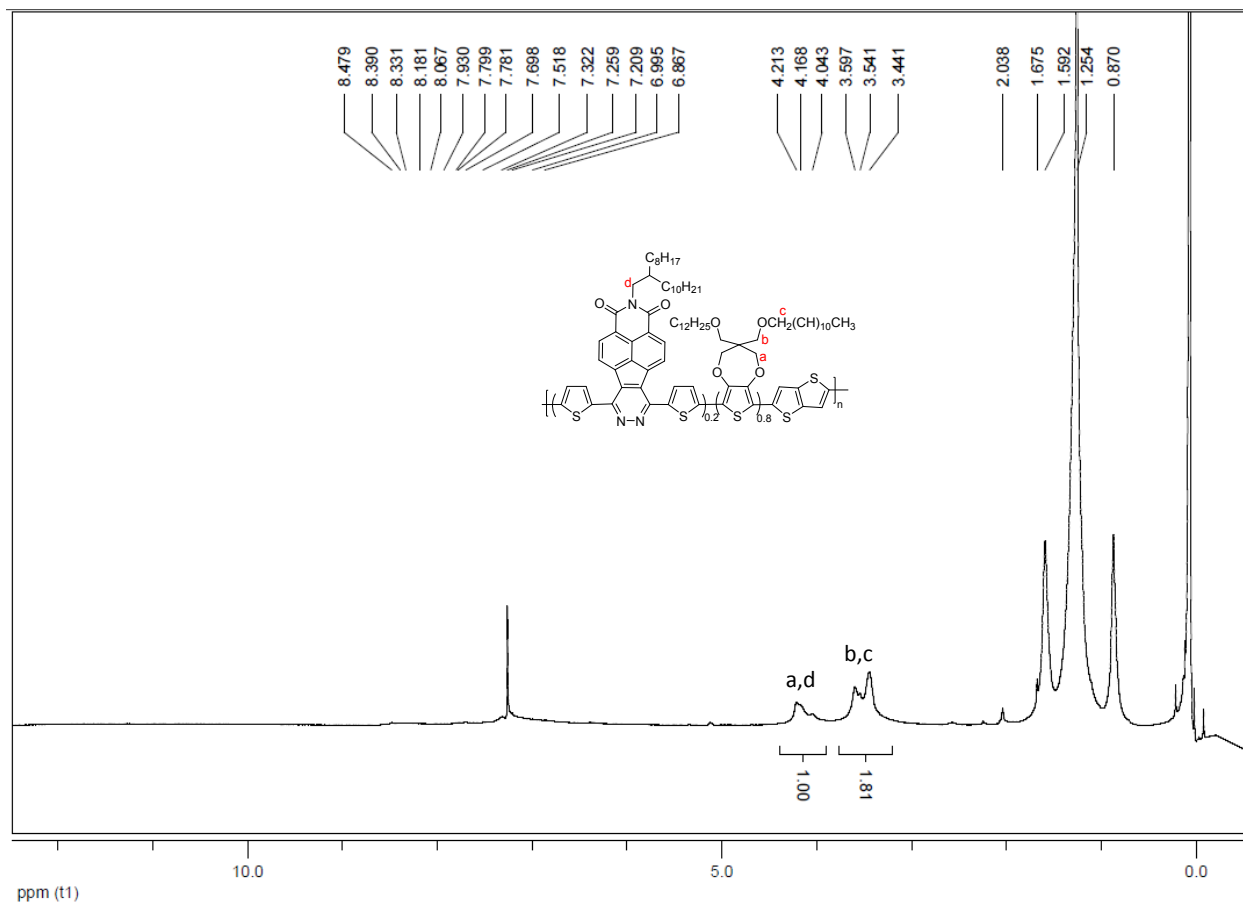

**Figure S11.** <sup>1</sup>H NMR spectrum of Polymer **P3** (CDCl<sub>3</sub>, room temperature).

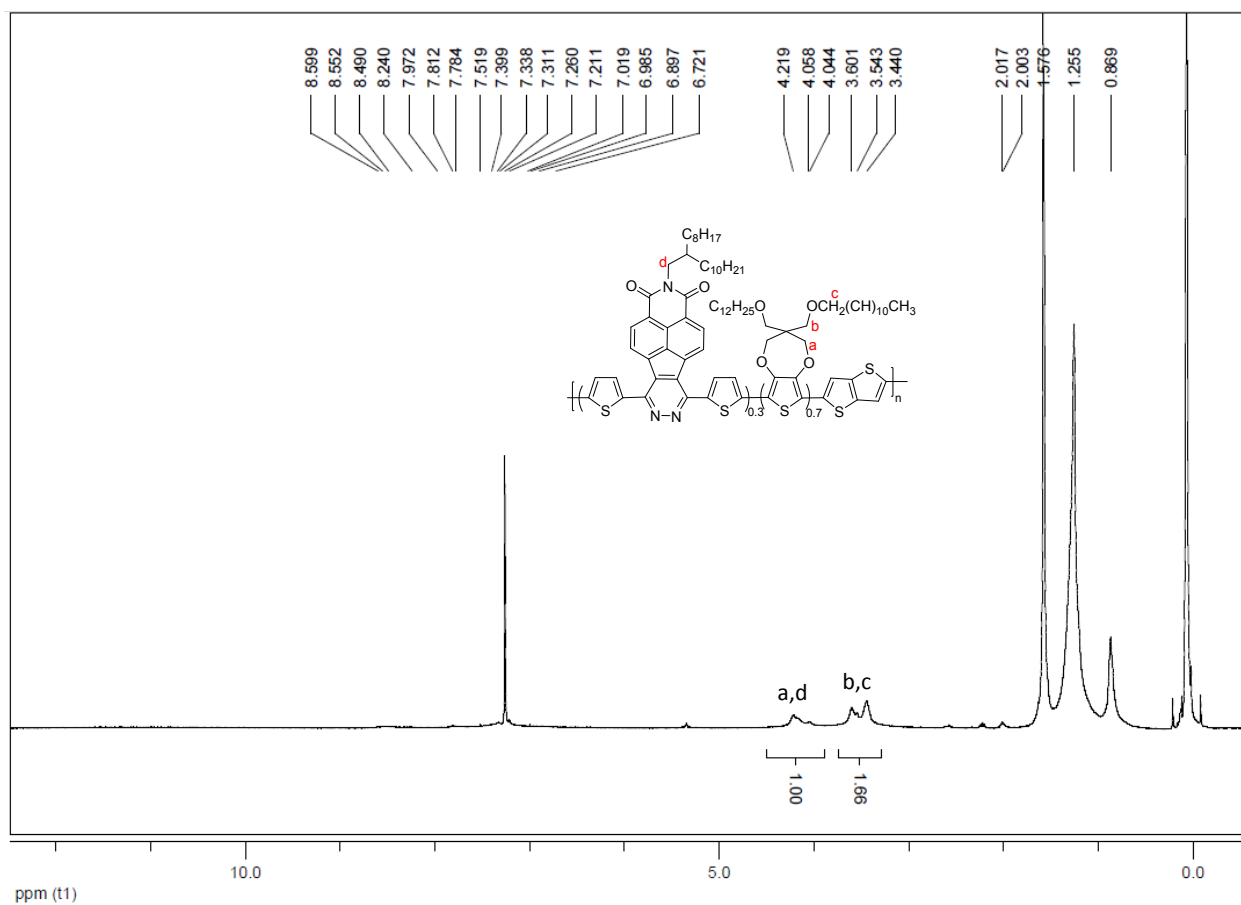

**Figure S12.**  $^1\text{H}$  NMR spectrum of Polymer P4 ( $\text{CDCl}_3$ , room temperature).

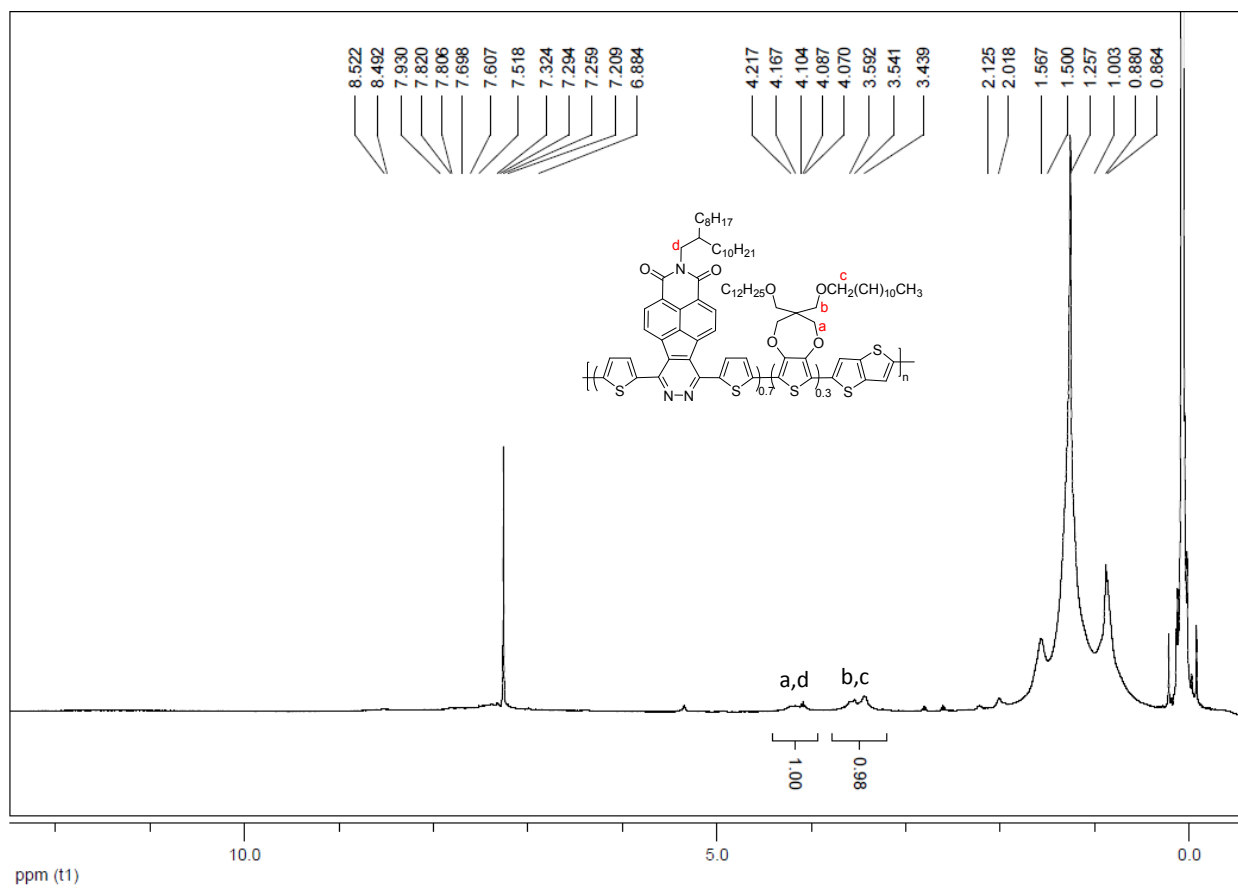

**Figure S13.**  $^1H$  NMR spectrum of Polymer **P5** ( $CDCl_3$ , room temperature).

## 2. High resolution MS data of all new compounds

D:\MAT95\converted\NapC8C10-1-c1-av  
study.]

03/02/2015 03:01:00 PM

NapC8C10

NapC8C10-1-c1-av#1 RT: 4.09 AV: 1 NL: 2.48E6  
T: + c Full ms [ 485.51-524.98]

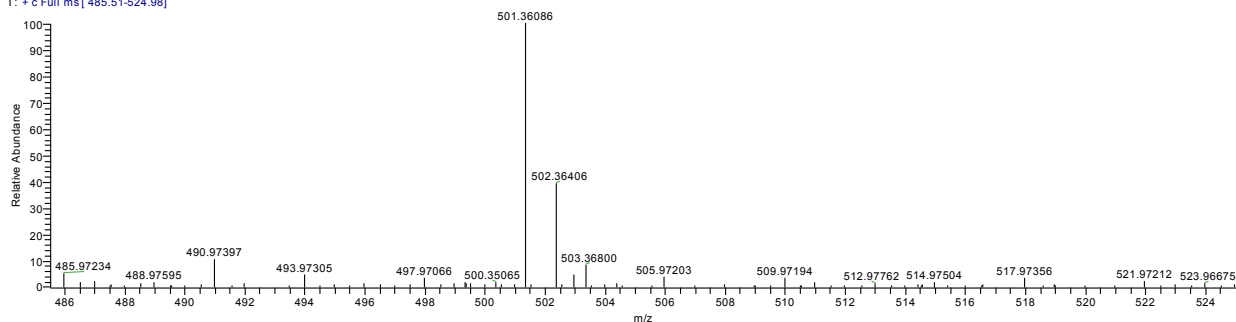

NapC8C10-1-c1-av#1 RT: 4.09

T: + c Full ms [ 485.51-524.98]

| m/z       | Intensity | Relative | Theo. Mass | Delta (ppm) | RDB equiv. | Composition                                                   |
|-----------|-----------|----------|------------|-------------|------------|---------------------------------------------------------------|
| 501.36086 | 2483799.0 | 100.00   | 501.36013  | 1.44        | 12.0       | C <sub>34</sub> H <sub>47</sub> O <sub>2</sub> N <sub>1</sub> |

Figure S14. HR-EI-MS spectrum of compound 6.

D:\MAT95\...\20150113\Naph\_C8C10-c1-av  
study.]

13/07/2015 04:45:55 PM

Naph C8C10

Naph\_C8C10-c1-av#1 RT: 6.72 AV: 1 NL: 2.55E6  
T: + c Full ms [ 852.95-898.96]

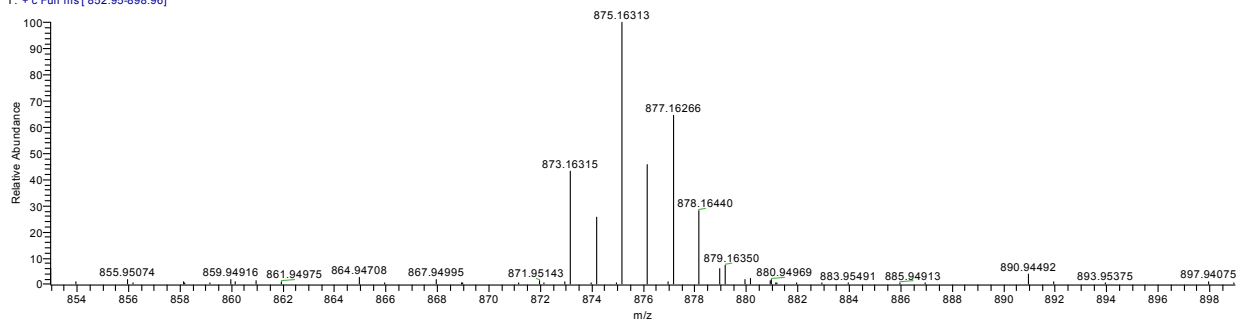

Naph\_C8C10-c1-av#1 RT: 6.72

T: + c Full ms [ 852.95-898.96]

m/z = 872.96694-873.39376

| m/z       | Intensity | Relative | Theo. Mass | Delta (ppm) | RDB equiv. | Composition                                                                                                              |
|-----------|-----------|----------|------------|-------------|------------|--------------------------------------------------------------------------------------------------------------------------|
| 873.16315 | 1091169.0 | 100.00   | 873.16275  | 0.46        | 21.0       | C <sub>44</sub> H <sub>49</sub> O <sub>2</sub> N <sub>3</sub> <sup>79</sup> Br <sub>2</sub> <sup>32</sup> S <sub>2</sub> |

Figure S15. HR-EI-MS spectrum of compound 10.

Naph\_C6-c1-av#1 RT: 0.95 AV: 1 NL: 6.51E6  
T: + c Full ms [ 650.94-697.96]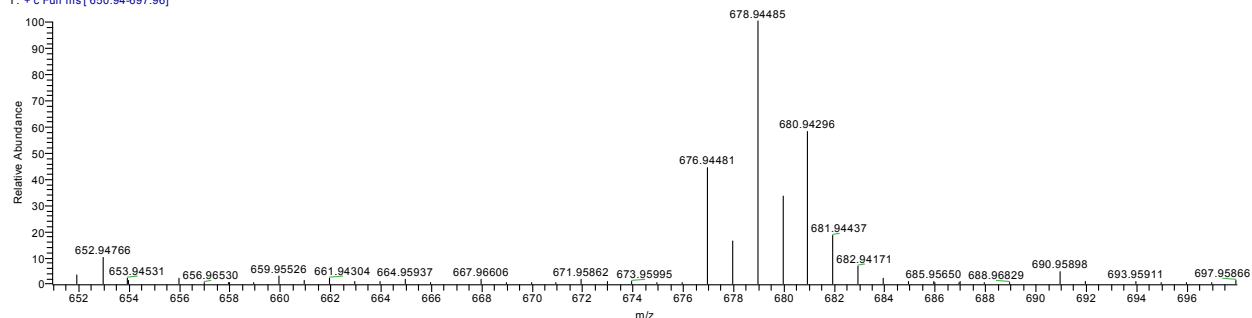Naph\_C6-c1-av#1 RT: 0.95  
T: + c Full ms [ 650.94-697.96]  
m/z = 676.67285-677.23989

| m/z       | Intensity | Relative | Theo. Mass | Delta (ppm) | RDB equiv. | Composition                                                                                                              |
|-----------|-----------|----------|------------|-------------|------------|--------------------------------------------------------------------------------------------------------------------------|
| 676.94481 | 2884069.0 | 100.00   | 676.94364  | 1.72        | 21.0       | C <sub>30</sub> H <sub>21</sub> O <sub>2</sub> N <sub>3</sub> <sup>79</sup> Br <sub>2</sub> <sup>32</sup> S <sub>2</sub> |

Figure S16. HR-EI-MS spectrum of compound 11.

Furan\_C6-c1-av#1 RT: 9.03 AV: 1 NL: 6.56E6  
T: + c Full ms [ 625.95-659.96]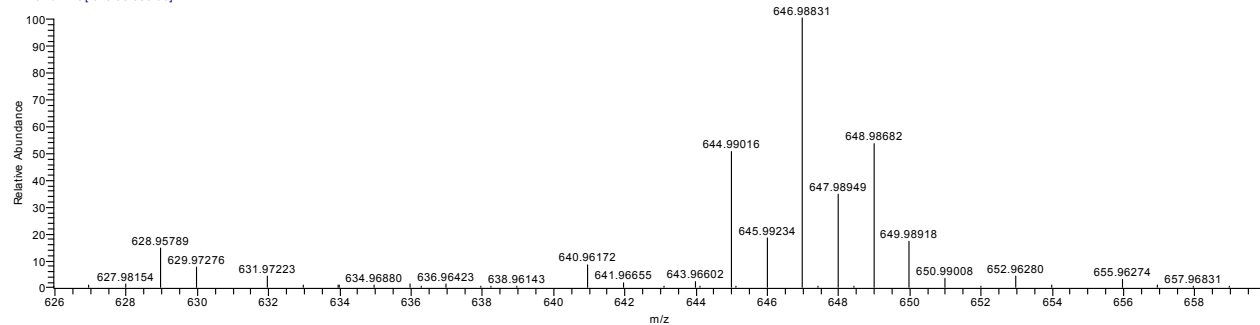Furan\_C6-c1-av#1 RT: 9.03  
T: + c Full ms [ 625.95-659.96]  
m/z = 644.84867-645.06951

| m/z       | Intensity | Relative | Theo. Mass | Delta (ppm) | RDB equiv. | Composition                                                                                 |
|-----------|-----------|----------|------------|-------------|------------|---------------------------------------------------------------------------------------------|
| 644.99016 | 3303838.0 | 100.00   | 644.98933  | 1.28        | 21.0       | C <sub>30</sub> H <sub>21</sub> O <sub>4</sub> N <sub>3</sub> <sup>79</sup> Br <sub>2</sub> |

Figure S17. HR-EI-MS spectrum of compound 12.



### 3. TD-DFT Calculation Details

The model compounds were built using GaussView and then optimized using DFT at the level of theory: B3LYP/6-31G with Gaussian 09.<sup>1</sup> The HOMO, LUMO and other properties were obtained at the DFT optimized geometries and summarized in Table S1.

**Table S1.** Summary of the frontier orbital energy levels of the model compounds listed in Figure 1.

| Molecule Model                                                                      | HOMO (eV) | LUMO (eV) | Dipole Moment (D) | Stoichiometry                                                                                |
|-------------------------------------------------------------------------------------|-----------|-----------|-------------------|----------------------------------------------------------------------------------------------|
| 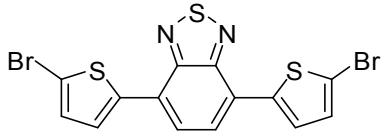   | -5.434    | -2.871    | 3.1025            | C <sub>14</sub> H <sub>6</sub> Br <sub>2</sub> N <sub>2</sub> S <sub>3</sub>                 |
|   | -5.237    | -2.185    | 0.6424            | C <sub>16</sub> H <sub>11</sub> Br <sub>2</sub> N <sub>3</sub> S <sub>2</sub>                |
|  | -5.622    | -2.982    | 1.1988            | C <sub>14</sub> H <sub>4</sub> Br <sub>2</sub> F <sub>2</sub> N <sub>2</sub> S <sub>3</sub>  |
|  | -5.906    | -3.084    | 0.4392            | C <sub>16</sub> H <sub>9</sub> Br <sub>2</sub> N <sub>3</sub> O <sub>2</sub> S <sub>2</sub>  |
|  | -6.086    | -3.418    | 0.7746            | C <sub>26</sub> H <sub>13</sub> Br <sub>2</sub> N <sub>3</sub> O <sub>2</sub> S <sub>2</sub> |

<sup>1</sup>Gaussian 09, Revision A.02, Frisch, M. J.; Trucks, G. W.; Schlegel, H. B.; Scuseria, G. E.; Robb, M. A.; Cheeseman, J. R.; Scalmani, G.; Barone, V.; Mennucci, B.; Petersson, G. A.; Nakatsuji, H.; Caricato, M.; Li, X.; Hratchian, H. P.; Izmaylov, A. F.; Bloino, J.; Zheng, G.; Sonnenberg, J. L.; Hada, M.; Ehara, M.; Toyota, K.; Fukuda, R.; Hasegawa, J.; Ishida, M.; Nakajima, T.; Honda, Y.; Kitao, O.; Nakai, H.; Vreven, T.; Montgomery, J. A., Jr.; Peralta, J. E.; Ogliaro, F.; Bearpark, M.; Heyd, J. J.; Brothers, E.; Kudin, K. N.; Staroverov, V. N.; Kobayashi, R.; Normand, J.; Raghavachari, K.; Rendell, A.; Burant, J. C.; Iyengar, S. S.; Tomasi, J.; Cossi, M.; Rega, N.; Millam, M. J.; Klene, M.; Knox, J. E.; Cross, J. B.; Bakken, V.; Adamo, C.; Jaramillo, J.; Gomperts, R.; Stratmann, R. E.; Yazyev, O.; Austin, A. J.; Cammi, R.; Pomelli, C.; Ochterski, J. W.; Martin, R. L.; Morokuma, K.; Zakrzewski, V. G.; Voth, G. A.; Salvador, P.; Dannenberg, J. J.; Dapprich, S.; Daniels, A. D.; Farkas, Ö.; Foresman, J. B.; Ortiz, J. V.; Cioslowski, J.; Fox, D. J. Gaussian, Inc., Wallingford CT, 2009.

**Table S2.** Summary of the calculated free energies of molecules and reactions using (DMol<sup>3</sup>: GGA-PW91-VPSR/dnp (fine)).

| Molecule             | Et electronic (ha) | ZPVE (ha) | G, T=298.15K (ha) | Et (ha) T=0K  | Et (ha) T=298.15K | Imaginary frequency (cm-1) |
|----------------------|--------------------|-----------|-------------------|---------------|-------------------|----------------------------|
| <b>Reactants</b>     |                    |           |                   |               |                   |                            |
| C10H4N4S2Br2 c       | -6538.6029492      | 0.1217351 | 0.0729996         | -6538.4812141 | -6538.5299496     | none                       |
| C10H4N4S2Br2 t       | -6538.6029970      | 0.1220251 | 0.0731367         | -6538.4809719 | -6538.5298603     | none                       |
| C10H4N4O2Br2 c       | -5890.9393366      | 0.1272394 | 0.0823843         | -5890.8120972 | -5890.8569523     | One, -9.7?                 |
| C10H4N4O2Br2 t       | -5890.9396775      | 0.1279023 | 0.0809868         | -5890.8117752 | -5890.8586907     | none                       |
| C16H11NO2            | -822.4178467       | 0.2279119 | 0.1869038         | -822.1899348  | -822.2309429      | none                       |
| <b>Intermediates</b> |                    |           |                   |               |                   |                            |
| C26H15N5O2S2Br2      | -7360.9828332      | 0.3503084 | 0.2873086         | -7360.6325248 | -7360.6955246     | One, -3.6                  |
| C26H15N5O2S2Br2_2    | -7360.9653869      | 0.3520948 | 0.2870169         | -7360.6132921 | -7360.6783700     | none                       |
| C26H15N5O4Br2        | -6713.3249086      | 0.3574429 | 0.2939618         | -6712.9674657 | -6713.0309468     | none                       |
| C26H15N5O4Br2_2      | -6713.3080570      | 0.3569776 | 0.2956479         | -6712.9510794 | -6713.0124091     | One, -7.0                  |

#### 4. Cyclic voltammetry of Compound 10

**Figure S18.** Cyclic voltammetry of compound **10** and its LUMO energy level.

## 5. Switching behaviour of devices

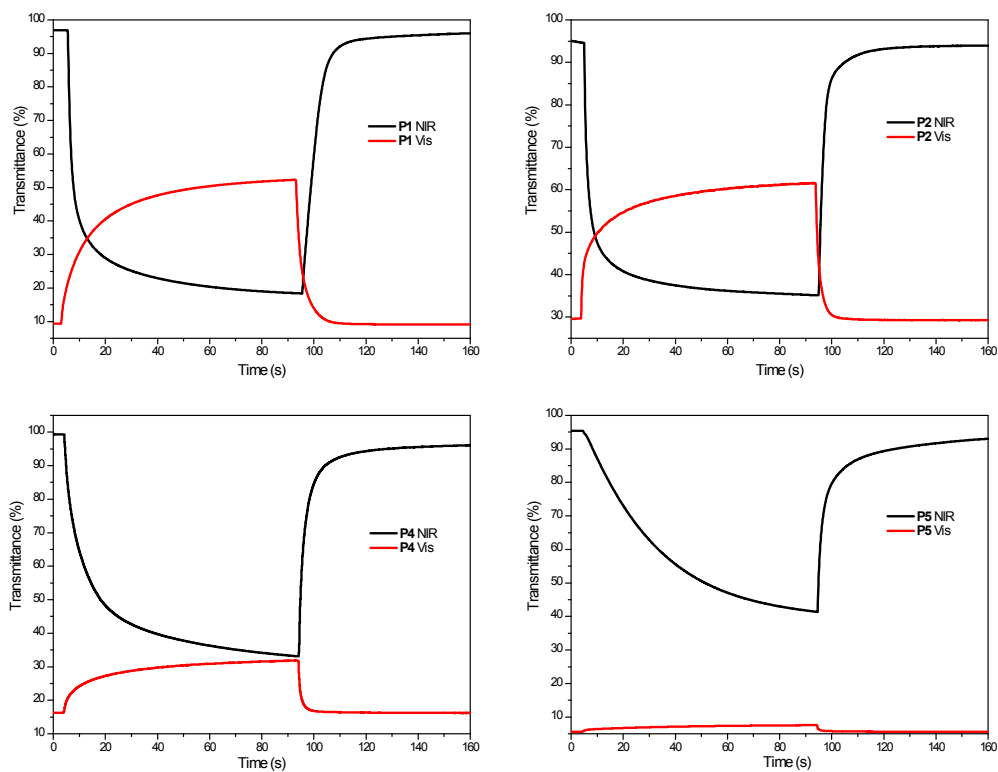

**Figure S19.** Switching behaviour of **P1**, **P2**, **P4** and **P5** device between +1.6 and -1.6 V.

## 6. Stability studies

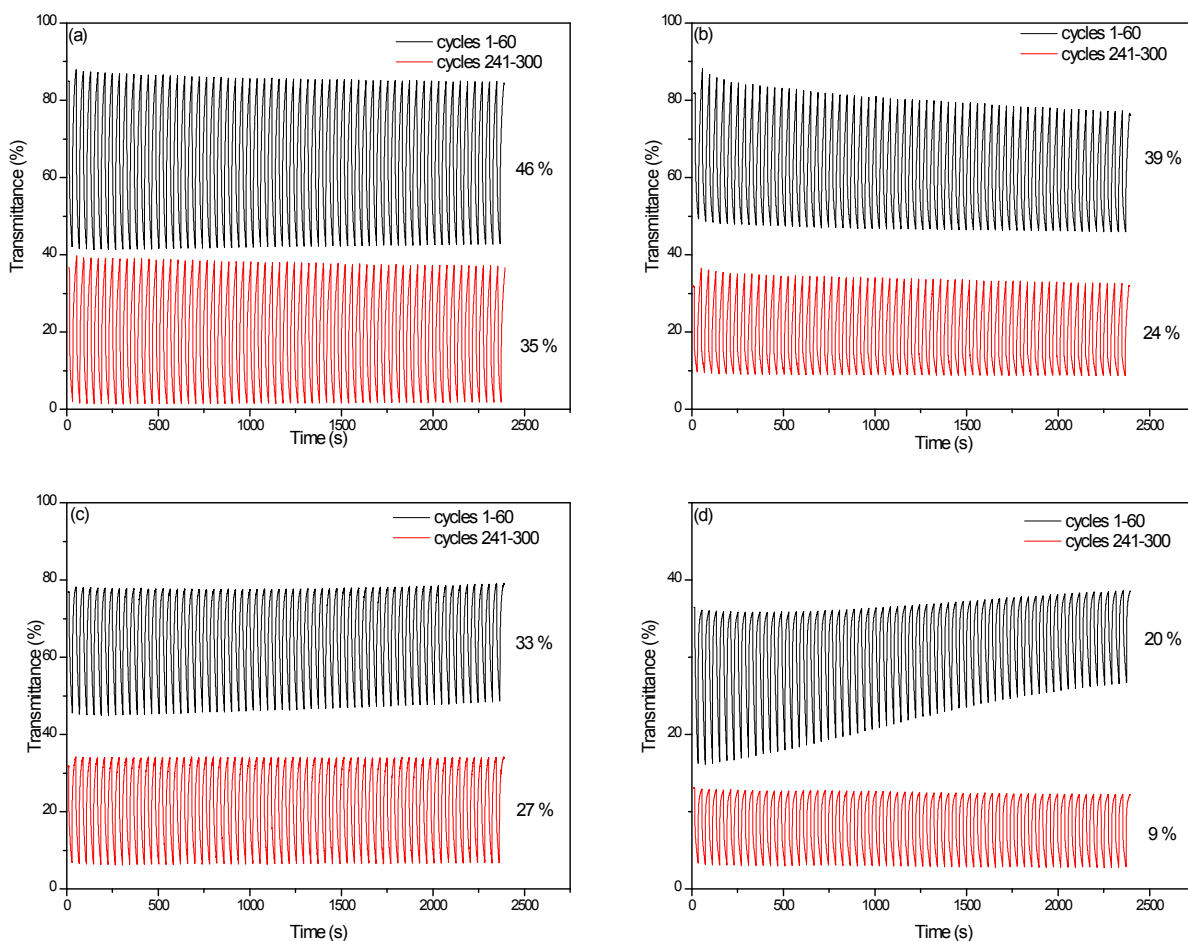

**Figure S20.** Stability studies of (a) P1, (b) P2, (c) P4 and (d) P5 devices in the NIR region.

## 7. X-ray crystallographic data

**Table S3.** Crystal data and structure refinement for **11**.

|                             |                                                                                                                                      |
|-----------------------------|--------------------------------------------------------------------------------------------------------------------------------------|
| <b>Empirical formula</b>    | $C_{30}H_{21}Br_2N_3O_2S_2$                                                                                                          |
| <b>Formula weight</b>       | 679.44                                                                                                                               |
| <b>Temperature</b>          | 100(2) K                                                                                                                             |
| <b>Wavelength</b>           | 1.54178 Å                                                                                                                            |
| <b>Crystal system</b>       | Monoclinic                                                                                                                           |
| <b>Space group</b>          | P 21/n                                                                                                                               |
| <b>Unit cell dimensions</b> | $a = 8.2952(4)$ Å, $\alpha = 90^\circ$<br>$b = 20.7323(9)$ Å, $\beta = 100.587(2)^\circ$<br>$c = 22.0577(10)$ Å, $\gamma = 90^\circ$ |
| <b>Volume</b>               | $3728.9(3)$ Å <sup>3</sup>                                                                                                           |

|                                         |                                             |
|-----------------------------------------|---------------------------------------------|
| <b>Z</b>                                | 4                                           |
| <b>Density (calculated)</b>             | 1.210 Mg/m <sup>3</sup>                     |
| <b>Absorption coefficient</b>           | 4.010 mm <sup>-1</sup>                      |
| <b>F(000)</b>                           | 1360                                        |
| <b>Crystal size</b>                     | 0.178 x 0.101 x 0.098 mm <sup>3</sup>       |
| <b>Theta range for data collection</b>  | 2.949 to 54.230°                            |
| <b>Index ranges</b>                     | -8<=h<=8, -21<=k<=15, -23<=l<=18            |
| <b>Reflections collected</b>            | 9028                                        |
| <b>Independent reflections</b>          | 4225 [R(int) = 0.0332]                      |
| <b>Refinement method</b>                | Full-matrix least-squares on F <sup>2</sup> |
| <b>Data / restraints / parameters</b>   | 4225 / 78 / 432                             |
| <b>Goodness-of-fit on F<sup>2</sup></b> | 1.091                                       |
| <b>Final R indices [I&gt;2sigma(I)]</b> | R1 = 0.0776, wR2 = 0.2322                   |
| <b>R indices (all data)</b>             | R1 = 0.0891, wR2 = 0.2454                   |
| <b>Extinction coefficient</b>           | n/a                                         |
| <b>Largest diff. peak and hole</b>      | 0.651 and -0.594 e.Å <sup>-3</sup>          |

**Table S4.** Crystal data and structure refinement for **12**.

|                                        |                                                                                                          |
|----------------------------------------|----------------------------------------------------------------------------------------------------------|
| <b>Empirical formula</b>               | C <sub>30</sub> H <sub>21</sub> Br <sub>2</sub> N <sub>3</sub> O <sub>4</sub>                            |
| <b>Formula weight</b>                  | 647.315                                                                                                  |
| <b>Temperature</b>                     | 100(2) K                                                                                                 |
| <b>Wavelength</b>                      | 0.71073 Å                                                                                                |
| <b>Crystal system</b>                  | Triclinic                                                                                                |
| <b>Space group</b>                     | P -1                                                                                                     |
| <b>Unit cell dimensions</b>            | a = 13.4552(6) Å, α = 78.712(2)°<br>b = 13.6974(7) Å, β = 73.880(2)°<br>c = 14.8065(6) Å, γ = 76.746(2)° |
| <b>Volume</b>                          | 2526.2(2) Å <sup>3</sup>                                                                                 |
| <b>Z</b>                               | 4                                                                                                        |
| <b>Density (calculated)</b>            | 1.702 Mg/m <sup>3</sup>                                                                                  |
| <b>Absorption coefficient</b>          | 3.253 mm <sup>-1</sup>                                                                                   |
| <b>F(000)</b>                          | 1296                                                                                                     |
| <b>Crystal size</b>                    | 0.321 x 0.150 x 0.100 mm <sup>3</sup>                                                                    |
| <b>Theta range for data collection</b> | 2.259 to 28.078°                                                                                         |
| <b>Index ranges</b>                    | -16<=h<=17, -17<=k<=18, -19<=l<=19                                                                       |

|                                         |                                             |
|-----------------------------------------|---------------------------------------------|
| <b>Reflections collected</b>            | 57642                                       |
| <b>Independent reflections</b>          | 12264 [R(int) = 0.0751]                     |
| <b>Completeness to theta = 25.242°</b>  | 99.9 %                                      |
| <b>Refinement method</b>                | Full-matrix least-squares on F <sup>2</sup> |
| <b>Data / restraints / parameters</b>   | 12264 / 0 / 705                             |
| <b>Goodness-of-fit on F<sup>2</sup></b> | 1.011                                       |
| <b>Final R indices [I&gt;2sigma(I)]</b> | R1 = 0.0417, wR2 = 0.0760                   |
| <b>R indices (all data)</b>             | R1 = 0.0842, wR2 = 0.0876                   |
| <b>Extinction coefficient</b>           | n/a                                         |

## 8. TGA thermograms

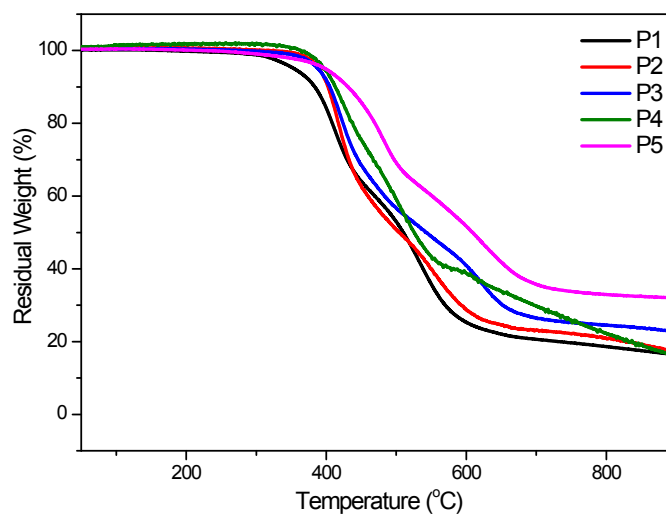

**Figure S21.** TGA thermograms of **P1 – P5**.

## 9. DSC thermograms

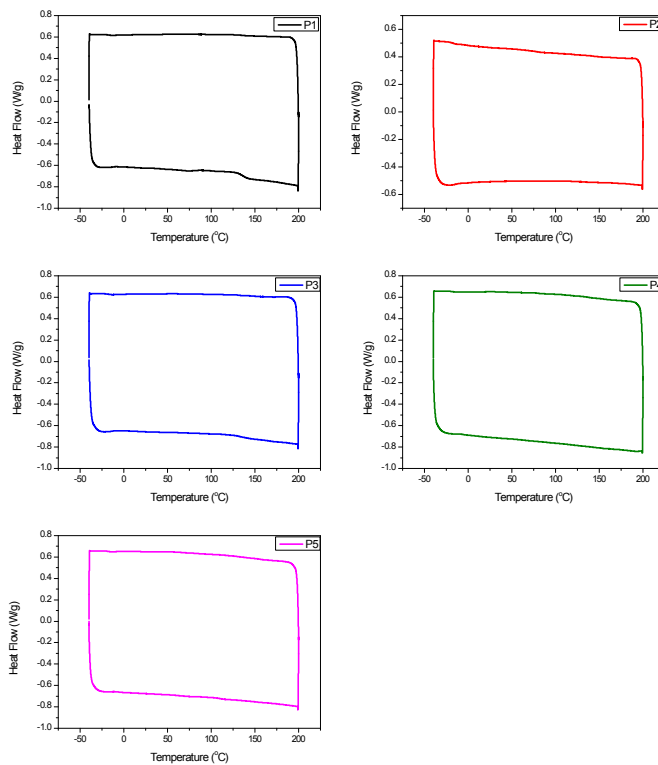

Figure S22. DSC thermograms of P1 – P5.

## 10. XRD diffractograms

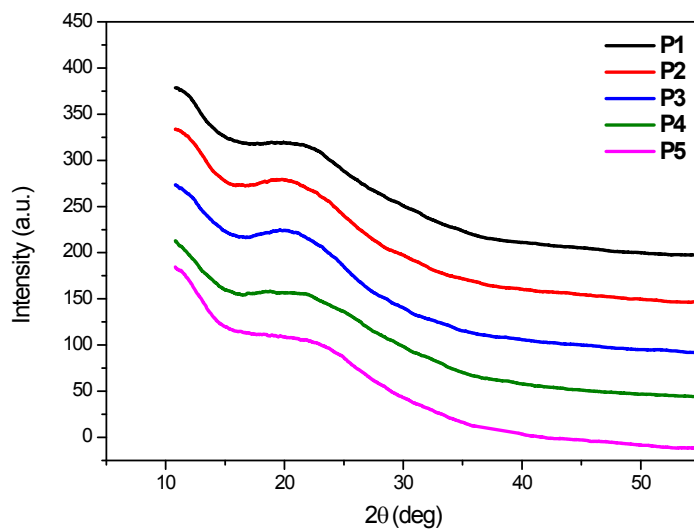

Figure S23. XRD diffractograms of P1 – P5

## 11. GPC chromatograms

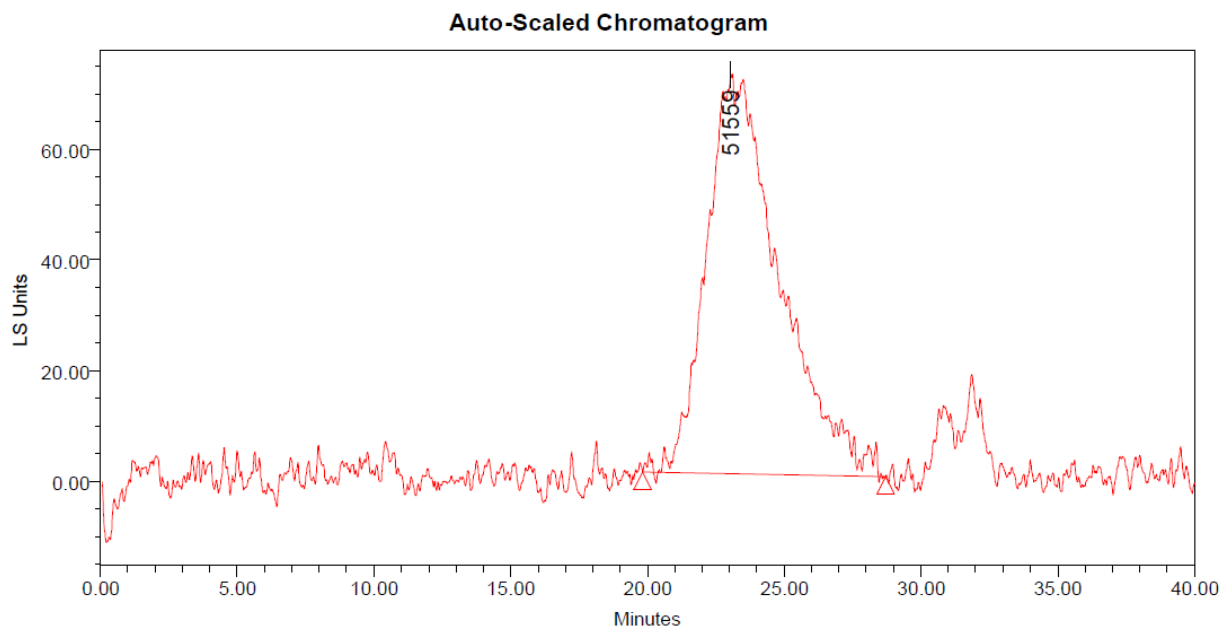

**Figure S24.** GPC chromatogram of **P1**.

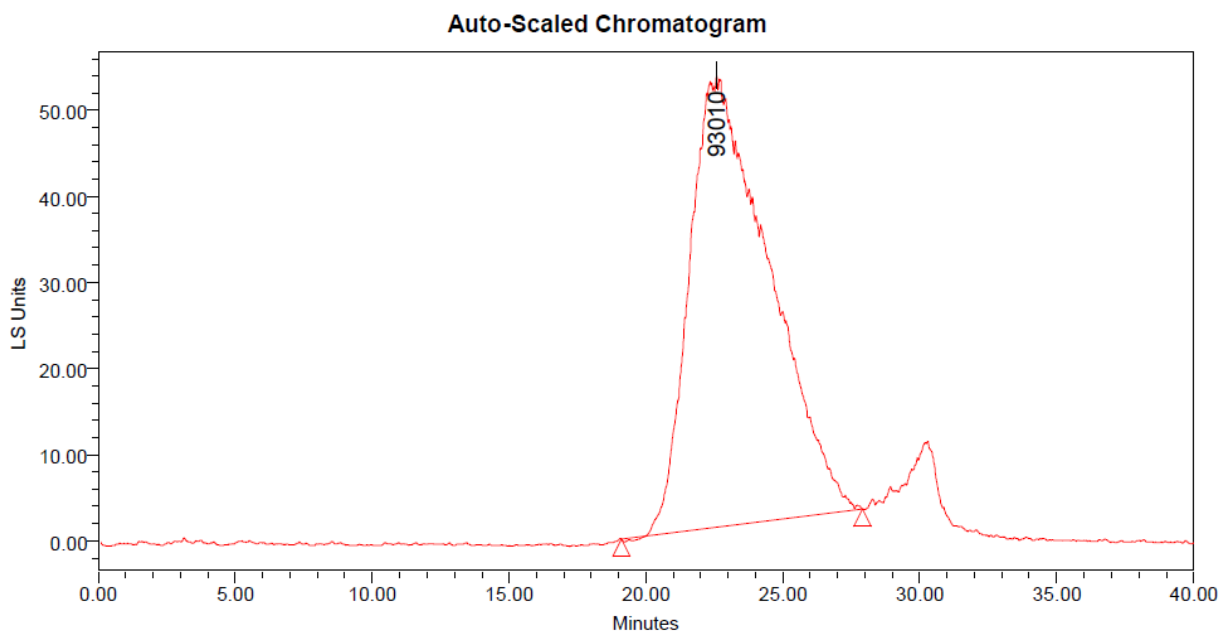

**Figure S25.** GPC chromatogram of **P2**.



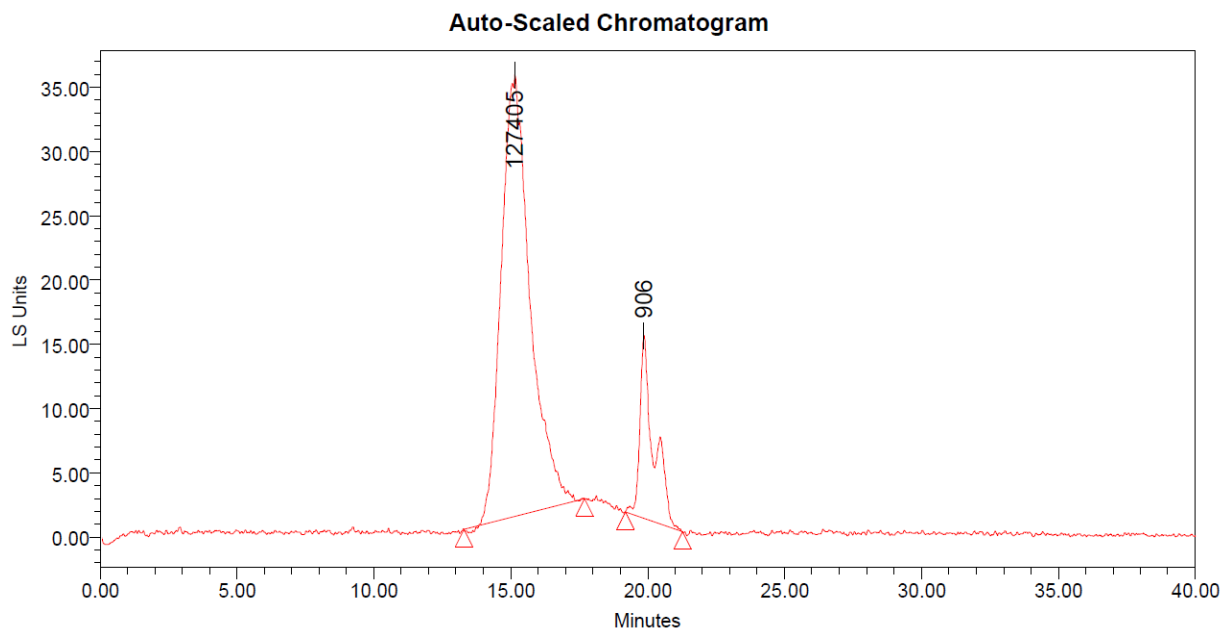

**Figure S26.** GPC chromatogram of **P3**.

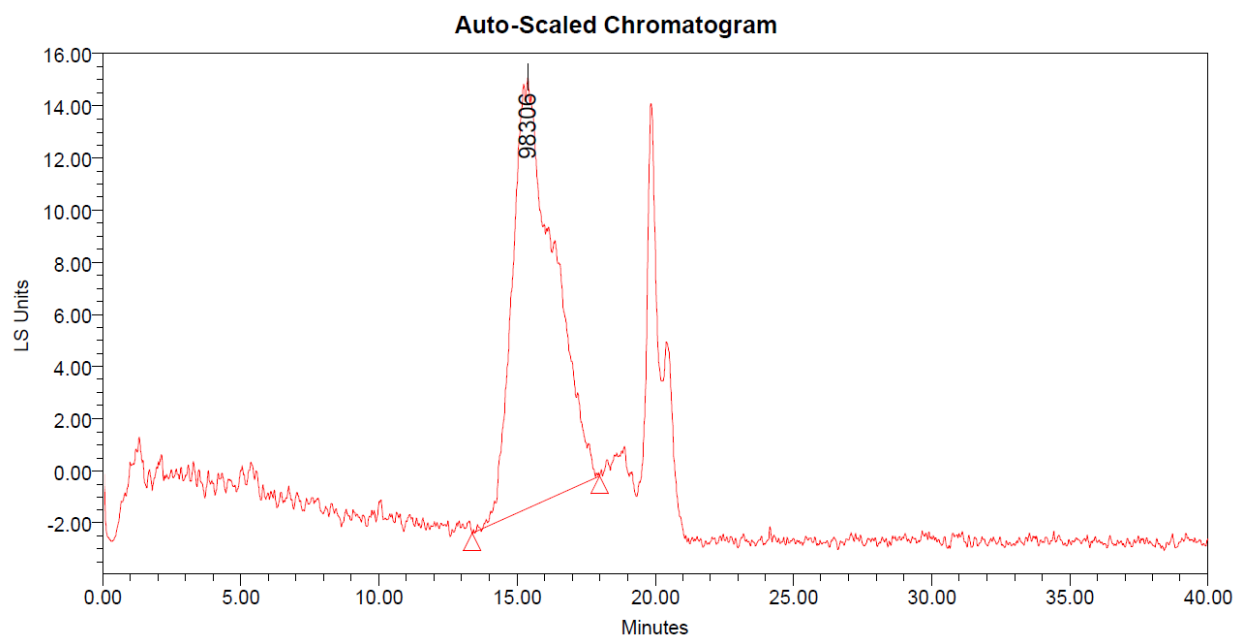

**Figure S27.** GPC chromatogram of **P4**.

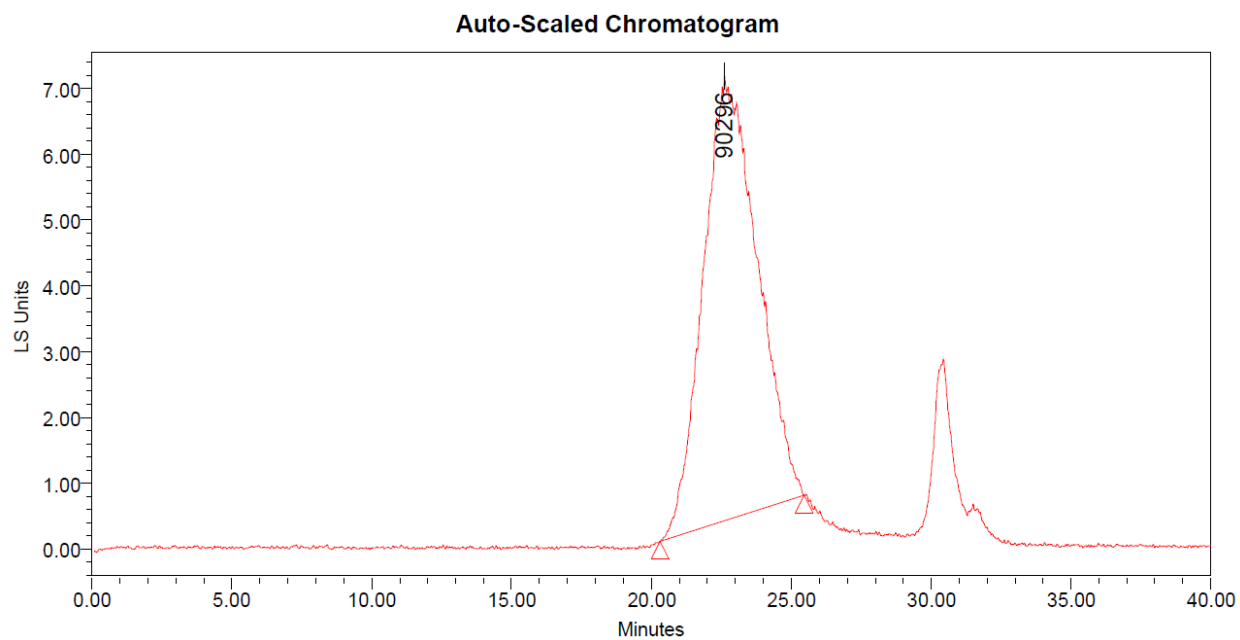

**Figure S28.** GPC chromatogram of **P5**.
